# Supplementary material for: Micronuclei in germ cells of hybrid frogs from Pelophylax esculentus complex contain gradually eliminated chromosomes
Source: PubMed Central journal article supplement (PMC7251083; doi:10.1038/s41598-020-64977-3), 2020-05-26
Supplement: 41598_2020_64977_MOESM1_ESM.pdf [file 41598_2020_64977_MOESM1_ESM.pdf]

## Supplementary Materials

### **Micronuclei in germ cells of hybrid frogs from *Pelophylax esculentus* complex contain gradually eliminated chromosomes**

Dedukh D, Riumin S, Chmielewska M, Rozenblut-Kościsty B, Kolenda K, Kazmierczak M, Dudzik A, Ogielska M, Krasikova A

**Supplementary Figure 1.** Gonocytes in the gonads of *P. ridibundus* (a) and diploid *P. esculentus* hybrids identified using anti-Vasa antibodies. Arrows indicate gonocytes. Arrowheads indicate micronuclei in the cytoplasm of gonocytes. Scale bars = 20  $\mu$ m.

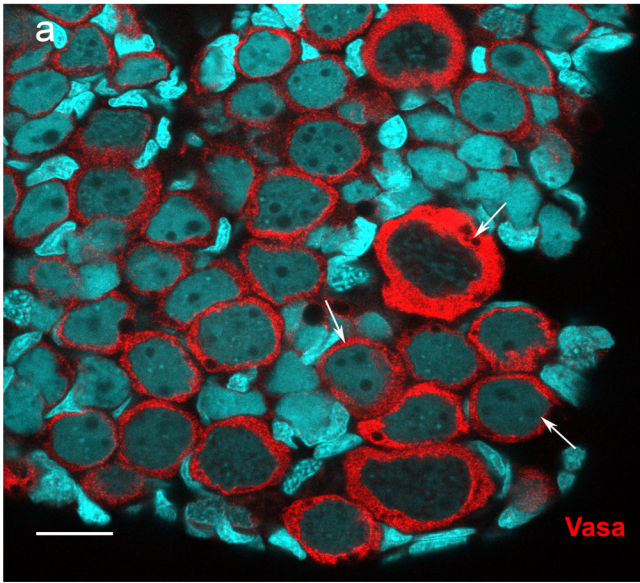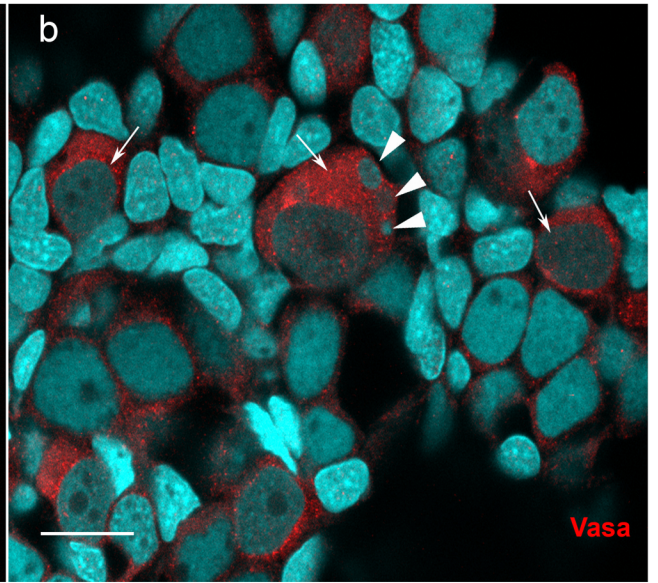

**Supplementary Figure 2.** Identification of the centromeric regions of all *P. ridibundus* chromosomes by FISH with a probe to centromeric RrS1 repeat. Metaphase chromosome spreads from *P. ridibundus* (a) and *P. esculentus* (b) are shown. Arrows indicate centromeric regions of *P. ridibundus* chromosomes. Scale bars = 10  $\mu\text{m}$ .

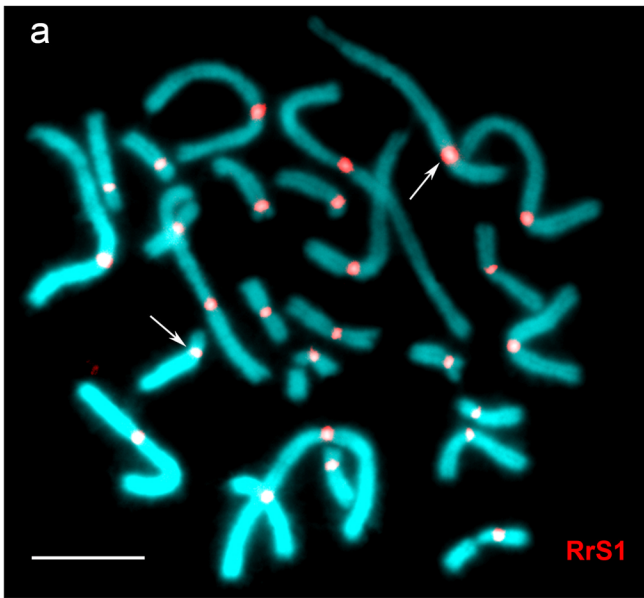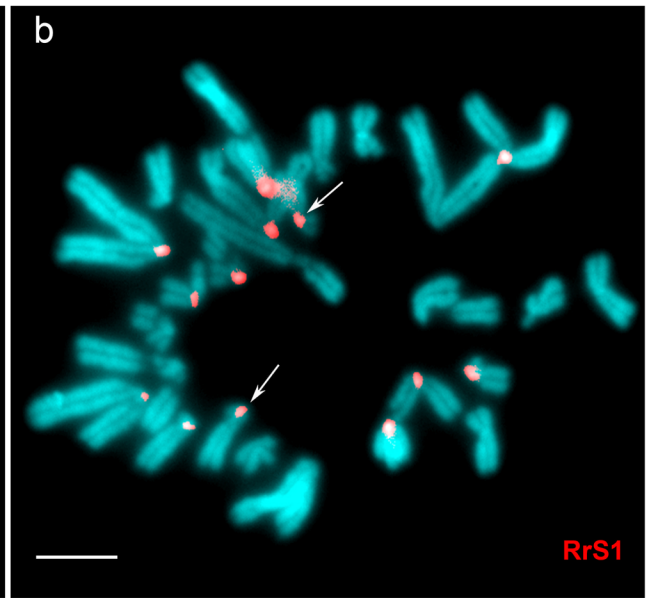

**Supplementary Table 1.** Tadpoles of water frogs from the *Pelophylax esculentus* complex used in the study.



|    |            |       |    |      |     |     |    |      |                                        |        |     |
|----|------------|-------|----|------|-----|-----|----|------|----------------------------------------|--------|-----|
| 2n | 9.1/2016   | 33    | RL | 887  | 177 | 210 | 16 | 7,6  | 2 cells: 1 chromosome,<br>2 chromosome | no, 2  | yes |
| 2n | 9.11/2016  | 28    | RL | 753  | 233 | 311 | 24 | 7,7  |                                        |        |     |
| 2n | 9.19/2016  | 27    | RL | 1278 | 356 | 421 | 25 | 5,9  |                                        |        |     |
| 2n | 9.25/2016  | 28    | RL | 1627 | 321 | 336 | 11 | 3,3  |                                        |        |     |
| 2n | 9.38/2016  | 29-30 | RL | 883  | 105 | 107 | 3  | 2,8  |                                        |        |     |
| 2n | 9.52/2016  | 33-34 | RL | 1378 | 279 | 315 | 18 | 5,7  |                                        |        |     |
| 2n | 9.57/2016  | 31    | RL | 521  | 145 | 173 | 11 | 6,4  |                                        |        |     |
| 2n | 9.60/2016  | 32    | RL | 1544 | 243 | 332 | 50 | 15,1 | 1 cell: 2 chromosomes                  | no     |     |
|    |            |       |    |      |     |     |    |      |                                        |        |     |
| 2n | 11.27/2016 | 28    | RL | 582  | 67  | 100 | 10 | 10,0 |                                        |        |     |
|    |            |       |    |      |     |     |    |      |                                        |        |     |
| 2n | 12.1/2016  | 36    | RL | 682  | 125 | 131 | 9  | 6,9  |                                        |        | yes |
| 2n | 12.3/2016  | 35-36 | RL | 95   | 33  | 53  | 0  | 0,0  |                                        |        |     |
| 2n | 12.11/2016 | 36    | RL | 682  | 125 | 131 | 9  | 6,9  |                                        |        |     |
| 2n | 12.18/2016 | 25    | RL | 321  | 68  | 68  | 3  | 4,4  |                                        |        |     |
| 2n | 12.22/2016 | 26    | RL | 763  | 92  | 95  | 3  | 3,2  |                                        |        |     |
| 2n | 12.26/2016 | 26    | RL | 486  | 87  | 98  | 5  | 5,1  |                                        |        |     |
| 2n | 12.27/2016 | 26    | RL | 754  | 131 | 179 | 21 | 11,7 |                                        |        |     |
|    |            |       |    |      |     |     |    |      |                                        |        |     |
| 2n | 16.4/2016  | 32    | RL | 666  | 99  | 145 | 14 | 9,7  |                                        |        |     |
|    |            |       |    |      |     |     |    |      |                                        |        |     |
| 2n | 16.7/2016  | 33    | RL | 1402 | 245 | 300 | 33 | 11,0 | 2 cells: 1 chromosome,<br>1 chromosome | no, no |     |
| 2n | 16.14/2016 | 29-30 | RL | 388  | 75  | 75  | 2  | 2,7  |                                        |        |     |
| 2n | 16.16/2016 | 32    | RL | 653  | 98  | 141 | 9  | 6,4  |                                        |        |     |
| 2n | 16.17/2016 | 33    | RL | 482  | 74  | 96  | 15 | 15,6 |                                        |        |     |
| 2n | 16.29/2016 | 33    | RL | 169  | 27  | 34  | 5  | 14,7 | 1 cell: 1 chromosome                   | no     | yes |
| 2n | 16.30/2016 | 32    | RL | 993  | 172 | 241 | 54 | 22,4 | 1 cell: 1 chromosome                   | no     | yes |
| 2n | 16.41/2016 | 33    | RL | 666  | 103 | 110 | 7  | 6,4  |                                        |        |     |
| 2n | 16.43/2016 | 33    | RL | 191  | 28  | 32  | 23 | 71,9 |                                        |        |     |
| 2n | 16.47/2016 | 32    | RL | 724  | 83  | 96  | 12 | 12,5 |                                        |        |     |
| 2n | 16.40/2016 | 31    | RL | 847  | 101 | 169 | 13 | 7,7  |                                        |        |     |
|    |            |       |    |      |     |     |    |      |                                        |        |     |
| 2n | 23.1/2016  | 33    | RL | 1328 | 431 | 763 | 28 | 3,7  |                                        |        |     |
| 2n | 23.2/2016  | 32    | RL | 956  | 114 | 197 | 17 | 8,6  |                                        |        |     |
| 2n | 23.11/2016 | 33-34 | RL | 138  | 20  | 26  | 4  | 15,4 | 1 cell: 1 chromosome                   | no     | yes |
| 2n | 23.46/2016 | 34    | RL | 180  | 28  | 34  | 2  | 5,9  |                                        |        | yes |
| 2n | 23.65/2016 | 34    | RL | 31   | 6   | 6   | 1  | 16,7 |                                        |        |     |



|    |            |       |    |      |     |     |    |      |                                                         |             |
|----|------------|-------|----|------|-----|-----|----|------|---------------------------------------------------------|-------------|
| 2n | 26.5/2016  | 33-34 | RL | 563  | 82  | 108 | 16 | 14,8 |                                                         |             |
| 2n | 26.7/2016  | 34    | RL | 894  | 88  | 135 | 6  | 4,4  |                                                         |             |
| 2n | 27.7/2016  | 30    | RL | 472  | 88  | 95  | 1  | 1,1  |                                                         |             |
| 2n | 27.13/2016 | 34    | RL | 745  | 89  | 96  | 5  | 5,2  |                                                         |             |
| 2n | 27.18/2016 | 33    | RL | 663  | 76  | 103 | 7  | 6,8  |                                                         |             |
| 2n | 28.7/2016  | 32-33 | RL | 753  | 87  | 128 | 12 | 9,4  |                                                         |             |
| 2n | 28.23/2016 | 33-34 | RL | 583  | 97  | 105 | 15 | 14,3 |                                                         |             |
| 2n | 30.17/2016 | 26    | RL | 385  | 59  | 85  | 16 | 18,8 |                                                         |             |
| 2n | 30.33/2016 | 32    | RL | 428  | 101 | 275 | 15 | 5,5  |                                                         |             |
| 2n | 30.35/2016 | 30    | RL | 194  | 89  | 89  | 0  | 0,0  |                                                         |             |
| 2n | 30.40/2016 | 30    | RL | 248  | 85  | 126 | 12 | 9,5  |                                                         |             |
| 2n | 30.41/2016 | 29    | RL | 299  | 71  | 94  | 7  | 7,4  |                                                         |             |
| 2n | 30.47/2016 | 31    | RL | 1403 | 61  | 71  | 19 | 26,8 | 2 cells: 1 chromosome,<br>1 chromosome                  | no, no      |
| 2n | 30.48/2016 | 33    | RL | 376  | 37  | 62  | 42 | 67,7 |                                                         |             |
| 2n | 30.56/2016 | 31    | RL | 2039 | 110 | 132 | 88 | 66,7 |                                                         |             |
| 2n | 37.3/2016  | 35    | RL | 38   | 7   | 7   | 0  | 0,0  |                                                         | yes         |
| 2n | 37.9/2016  | 30    | RL | 678  | 53  | 61  | 8  | 13,1 | 1 cell: 1 chromosome                                    | no          |
| 2n | 7.11/2017  | 39    | RL | 432  | 85  | 100 | 13 | 13,0 |                                                         |             |
| 2n | 10.7/2017  | 39    | RL | 88   | 31  | 59  | 2  | 3,4  |                                                         |             |
| 2n | 10.27/2017 | 38    | RL | 582  | 67  | 100 | 10 | 10,0 |                                                         |             |
| 2n | 15.4/2017  | 30    | RL | 354  | 77  | 79  | 5  | 6,3  |                                                         |             |
| 2n | 16.5/2017  | 32    | RL | 574  | 121 | 143 | 15 | 10,5 | 3 cell: 1 chromosome,<br>2 chromosomes,<br>1 chromosome | no, no, yes |
| 2n | 16.6/2017  | 29    | RL | 653  | 86  | 100 | 8  | 8,0  | 1 cell: chromosome                                      | no          |
| 2n | 17.37/2017 | 37-38 | RL | 389  | 85  | 109 | 13 | 11,9 |                                                         | yes         |
| 2n | 17.x/2017  | 36    | RL | 146  | 76  | 88  | 7  | 8,0  |                                                         | yes         |
| 2n | 17.33/2017 | 37    | RL | 196  | 69  | 88  | 11 | 12,5 |                                                         | yes         |





**Supplementary Table 2.** Parental individuals of water frogs from the *Pelophylax esculentus* complex used in crossing experiments.

**Supplementary table 2**

| <b>Crosses IDs</b> | <b>Sex</b> | <b>Adult frogs IDs</b> | <b>Genotype</b> | <b>PCR Pel SAI1</b> | <b>Habitat</b>   | <b>Analyzed tadpoles genotype</b> |
|--------------------|------------|------------------------|-----------------|---------------------|------------------|-----------------------------------|
| 1/2016             | female     | 1/16                   | RL              | RL                  | Wysoka Kamieńska | LLR                               |
|                    | male       | 4/16                   | LL              | LL                  | Sanie            |                                   |
| 4/2016             | female     | 1/16                   | RL              | RL                  | Wysoka Kamieńska | LLR                               |
|                    | male       | 6/16                   | LLR             | RKL                 | Wysoka Kamieńska |                                   |
| 5/2016             | female     | 2/16                   | RL              | KL                  | Uciechów         | RL                                |
|                    | male       | 7/16                   | LLR             | 0                   | Uciechów         |                                   |
| 7/2016             | female     | 2/16                   | RL              | KL                  | Uciechów         | RL                                |
|                    | male       | 8/16                   | RR              | 0                   | Ruda Milicka     |                                   |
| 8/2016             | female     | 3/16                   | RL              | KL                  | Uciechów         | RL                                |
|                    | male       | 8/16                   | RR              | 0                   | Ruda Milicka     |                                   |
| 9/2016             | female     | 10/16                  | LL              | LL                  | Sanie            | RL                                |
|                    | male       | 9/16                   | RL              | KL                  | Uciechów         |                                   |
| 11/2016            | female     | 12/16                  | RL              | KL                  | Uciechów         | RL                                |
|                    | male       | 13/16                  | LL              | 0                   | Sanie            |                                   |
| 12/2016            | female     | 12/16                  | RL              | KL                  | Uciechów         | RL                                |
|                    | male       | 14/16                  | LLR/RRL?        | KL                  | Uciechów         |                                   |
| 16/2016            | female     | 18/16                  | RL              | 0                   | Uciechów         | RL                                |
|                    | male       | 19/16                  | LL              | 0                   | Sanie            |                                   |
| 23/2016            | female     | 27/16                  | LL              | 0                   | Sanie            | RL                                |
|                    | male       | 28/16                  | RL              | 0                   | Wysoka Kamieńska |                                   |
| 26/2016            | female     | 34/16                  | LLR             | 0                   | Wysoka Kamieńska | RL                                |
|                    | male       | 32/16                  | RL              | 0                   | Wysoka Kamieńska |                                   |
| 27/2016            | female     | 35/16                  | LLR             | RKL                 | Wysoka Kamieńska | RL                                |
|                    | male       | 33/16                  | RL              | RKL                 | Wysoka Kamieńska |                                   |
| 28/2016            | female     | 36/16                  | LL              | LL                  | Sanie            | RL                                |
|                    | male       | 37/16                  | RL              | RKL                 | Wysoka Kamieńska |                                   |
| 30/2016            | female     | 38/16                  | RR              | RR                  | Ruda Milicka     | RL                                |

|                              |        |              |     |    |                         |    |
|------------------------------|--------|--------------|-----|----|-------------------------|----|
|                              | male   | 40/16        | LLR | RL | Wysoka Kamińska         |    |
| 37/2016                      | female | 50/16        | RL  | 0  | Uciechów                | RL |
|                              | male   | 52/16        | LL  | 0  | Sanie                   |    |
| 7/2017                       | female | 2/17         | RL  | 0  | Uciechów                | RL |
|                              | male   | 18/17        | LL  | 0  | surroundings of Wrocław |    |
| 10/2017                      | female | 1/17         | LLR | 0  | Uciechów                | RL |
|                              | male   | 11/17        | RL  | 0  | Uciechów                |    |
| 15/2017                      | female | 1/17         | LLR | 0  | Uciechów                | RL |
|                              | male   | 20/17        | RR  | 0  | Ruda Milicka            |    |
| 16/2017                      | female | 21/17        | LL  | 0  | Urwiłał, Mazury         | RL |
|                              | male   | 20/17        | RR  | 0  | Ruda Milicka            |    |
| 17/2017                      | female | 21/17        | LL  | 0  | Urwiłał, Mazury         | RL |
|                              | male   | 11/17        | RL  | 0  | Uciechów                |    |
|                              |        |              |     |    |                         |    |
| 10/2016                      | female | 10/16        | LL  | LL | Sanie                   | LL |
|                              | male   | 11/16        | LL  | LL | Sanie                   |    |
| 29/2016                      | female | 38/16        | RR  | RR | Ruda Milicka            | RR |
|                              | male   | 39/16        | RR  | RK | Ruda Milicka            |    |
|                              |        |              |     |    |                         |    |
| <b>IF on tissue sections</b> |        |              |     |    |                         |    |
| 2/2015                       | female | 6/2n/15 Bacz | RR  | RR | Wysoka Kamińska         | RL |
|                              | male   | 14/15        | LL  | LL | surroundings of Wrocław |    |
| <b>Histology</b>             |        |              |     |    |                         |    |
| 25/2014                      | female | 19/14        | LL  | LL | Urwiłał, Mazury         |    |
|                              | male   | 23/14        | RR  | RR | Ruda Milicka            |    |
| 2/2015                       | female | 5/15         | RR  | RR | Ruda Milicka            |    |
|                              | male   | 1/15         | LL  | LL | surroundings of Wrocław |    |
